# Supplementary material for: Prediction Model Performance With Different Imputation Strategies: A Simulation Study Using a North American ICU Registry
Source: PubMed Central journal article supplement — Pediatr Crit Care Med. 2021 Sep 27;23(1):e29–44. doi: 10.1097/PCC.0000000000002835 (PMC8719509; doi:10.1097/pcc.0000000000002835), 2021-09-27
Supplement: pcc-23-e29-s001.pdf [file pcc-23-e29-s001.pdf]

## Supplementary Figures

### Prediction model performance with different imputation strategies – a simulation study using a North American intensive care unit registry

J Steif, R Brant, RS Sreepada, N West, S Murthy, M Görge

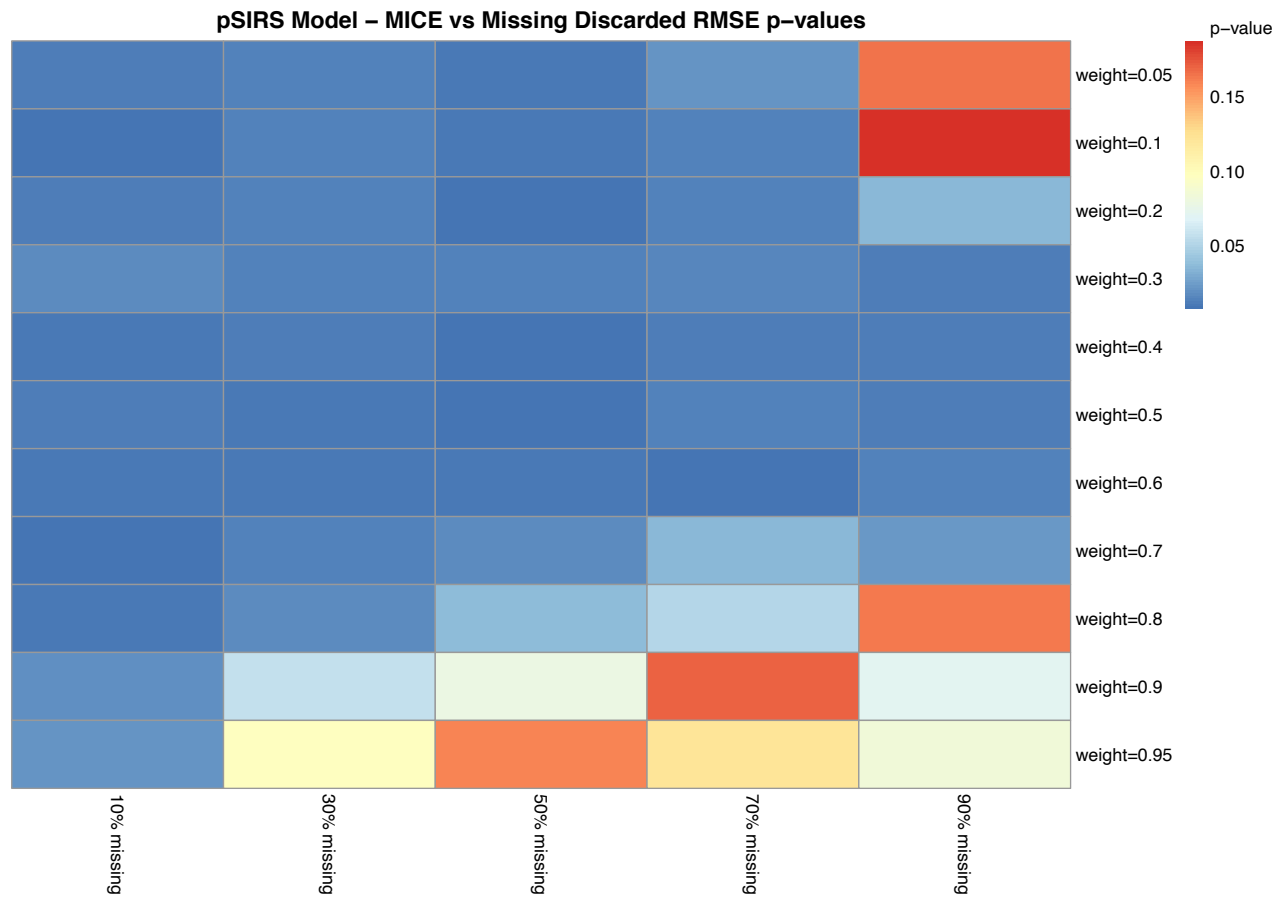

**Supplementary Figure A: Heatmap of statistical significance (p-values) for comparison of root mean square error (RMSE) between multivariate imputation by chained equations (MICE) and complete case analysis (missing-discarded) on the pediatric systemic inflammatory response syndrome (pSIRS) model, when varying the amount of missingness from 10%, 30%, 50%, 70%, to 90% and varying the temperature sampling weight from 0.05 to 0.95.**

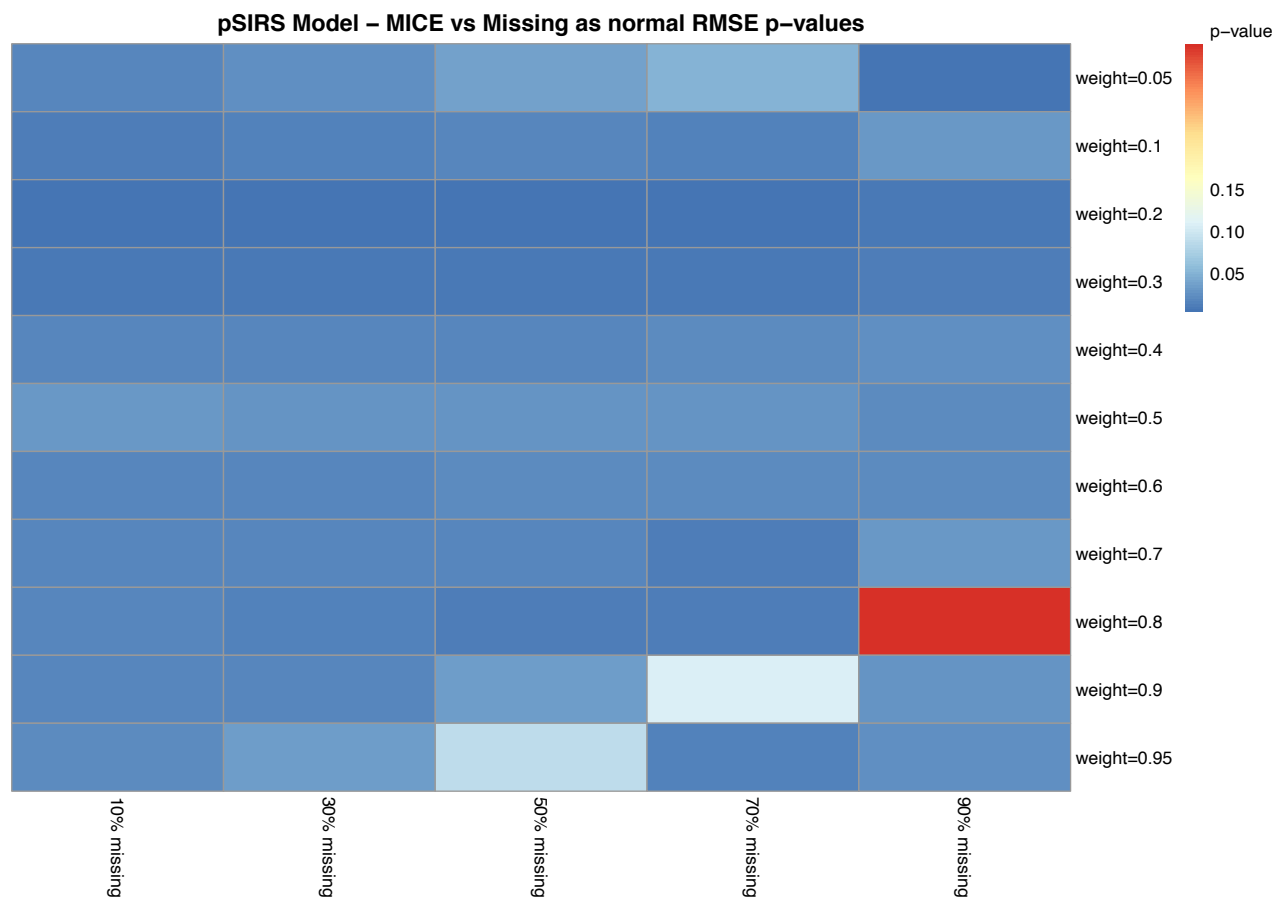

**Supplementary Figure B: Heatmap of statistical significance (p-values) for comparison of root mean square error (RMSE) between multivariate imputation by chained equations (MICE) and missing-as-normal on the pediatric systemic inflammatory response syndrome (pSIRS) model, when varying the amount of missingness from 10%, 30%, 50%, 70%, to 90% and varying the temperature sampling weight from 0.05 to 0.95.**

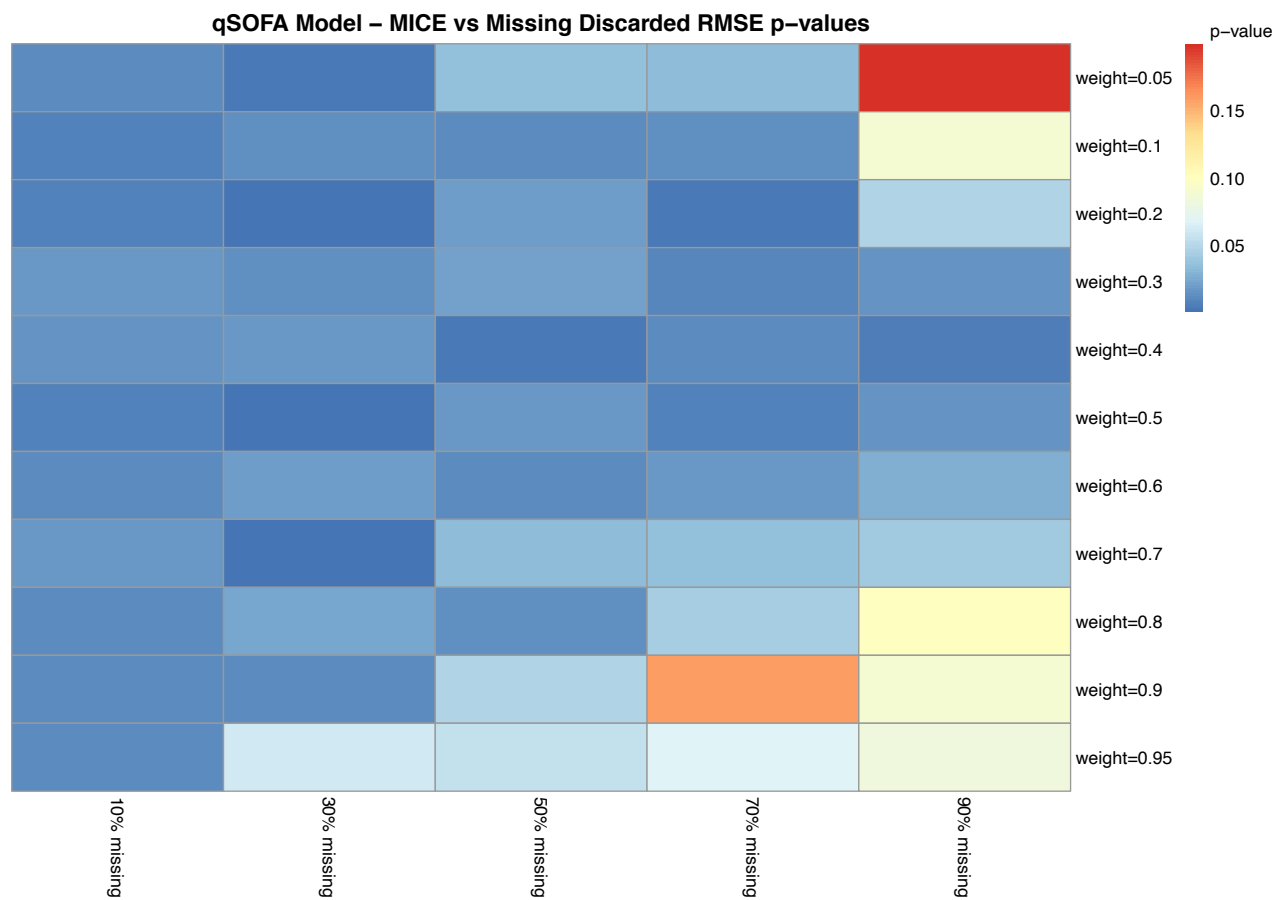

**Supplementary Figure C: Heatmap of statistical significance (p-values) for comparison of root mean square error (RMSE) between multivariate imputation by chained equations (MICE) and complete case analysis (missing-discarded) on the Sequential [Sepsis-Related] Organ Failure Assessment (qSOFA) model, when varying the amount of missingness from 10%, 30%, 50%, 70%, to 90% and varying the temperature sampling weight from 0.05 to 0.95.**

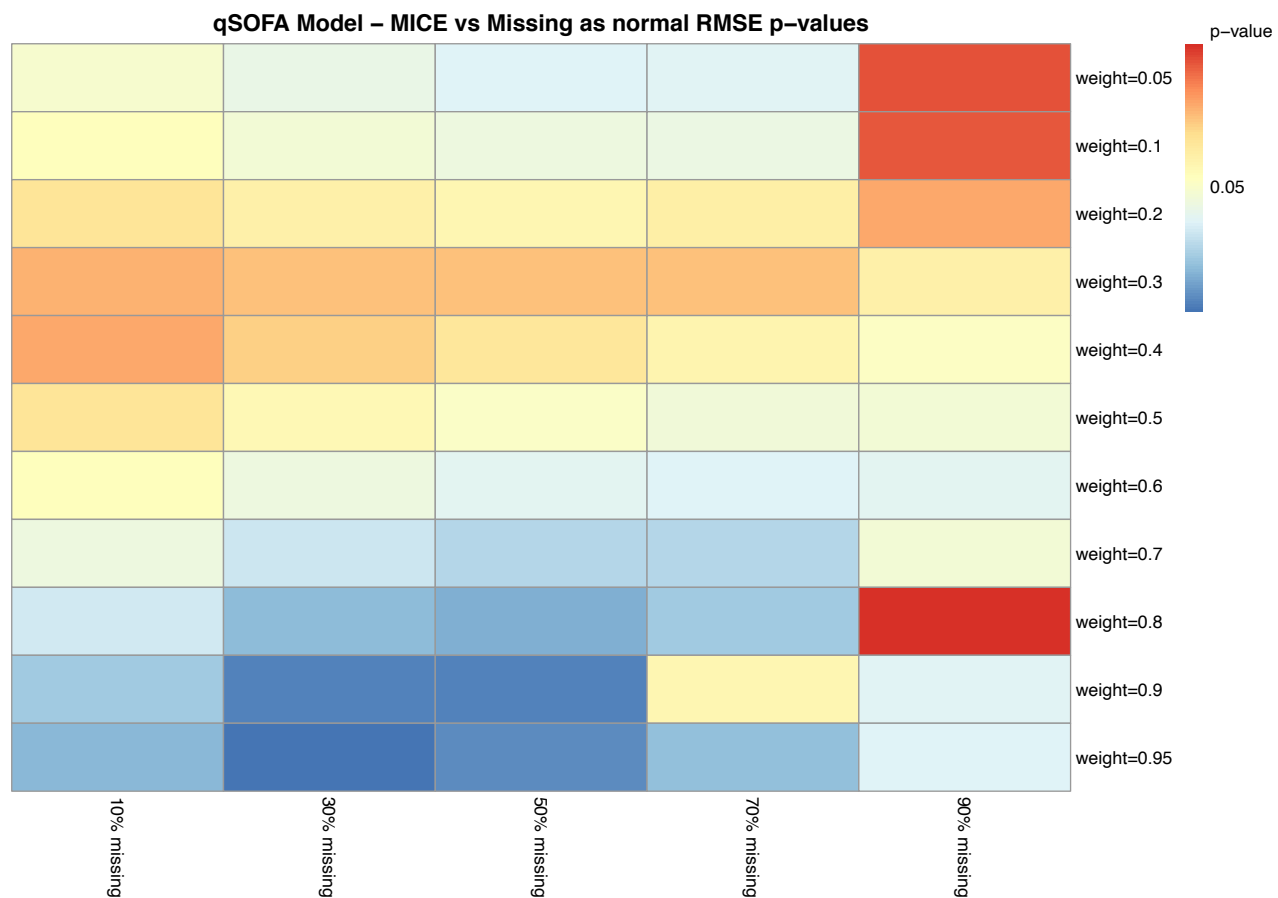

**Supplementary Figure D: Heatmap of statistical significance (p-values) for comparison of root mean square error (RMSE) between multivariate imputation by chained equations (MICE) and missing-as-normal on the Sequential [Sepsis-Related] Organ Failure Assessment (qSOFA) model, when varying the amount of missingness from 10%, 30%, 50%, 70%, to 90% and varying the temperature sampling weight from 0.05 to 0.95.**

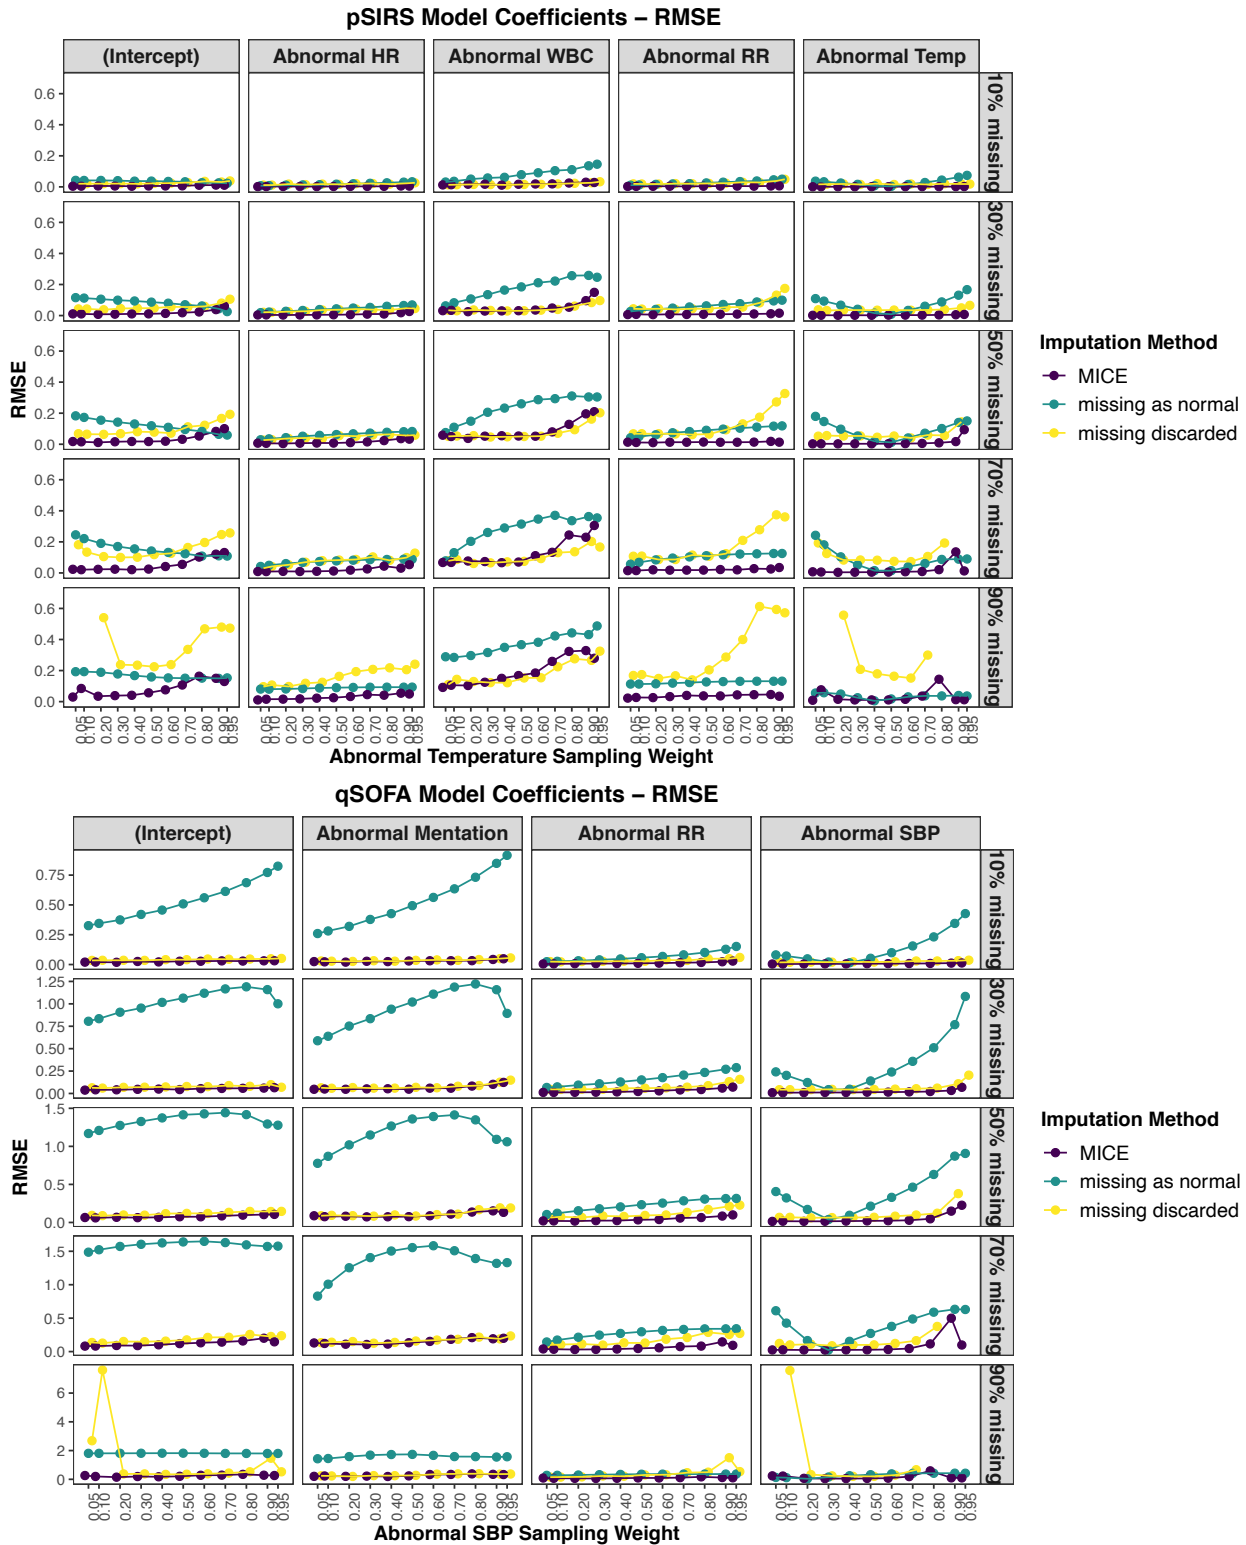

**Supplementary Figure E: Root mean square error (RMSE) for model coefficients when varying the amounts of missingness from 10% (top row of plots), over 30%, 50%, 70%, to 90% (bottom row of plots). The model coefficients for **pediatric systemic inflammatory response syndrome (pSIRS)**, top subplot) included the intercept, as well as abnormal heart rate (HR), white blood cell counts (WBC), respiratory rate (RR), and temperature (Temp). The model coefficients for the **quick Sequential [Sepsis-Related] Organ Failure Assessment (qSOFA)**, bottom subplot) included the intercept, as well as abnormal mentation, respiratory rate (RR), and systolic blood pressure (SBP).**

pSIRS and qSOFA Models – Area under Curve (AUC)

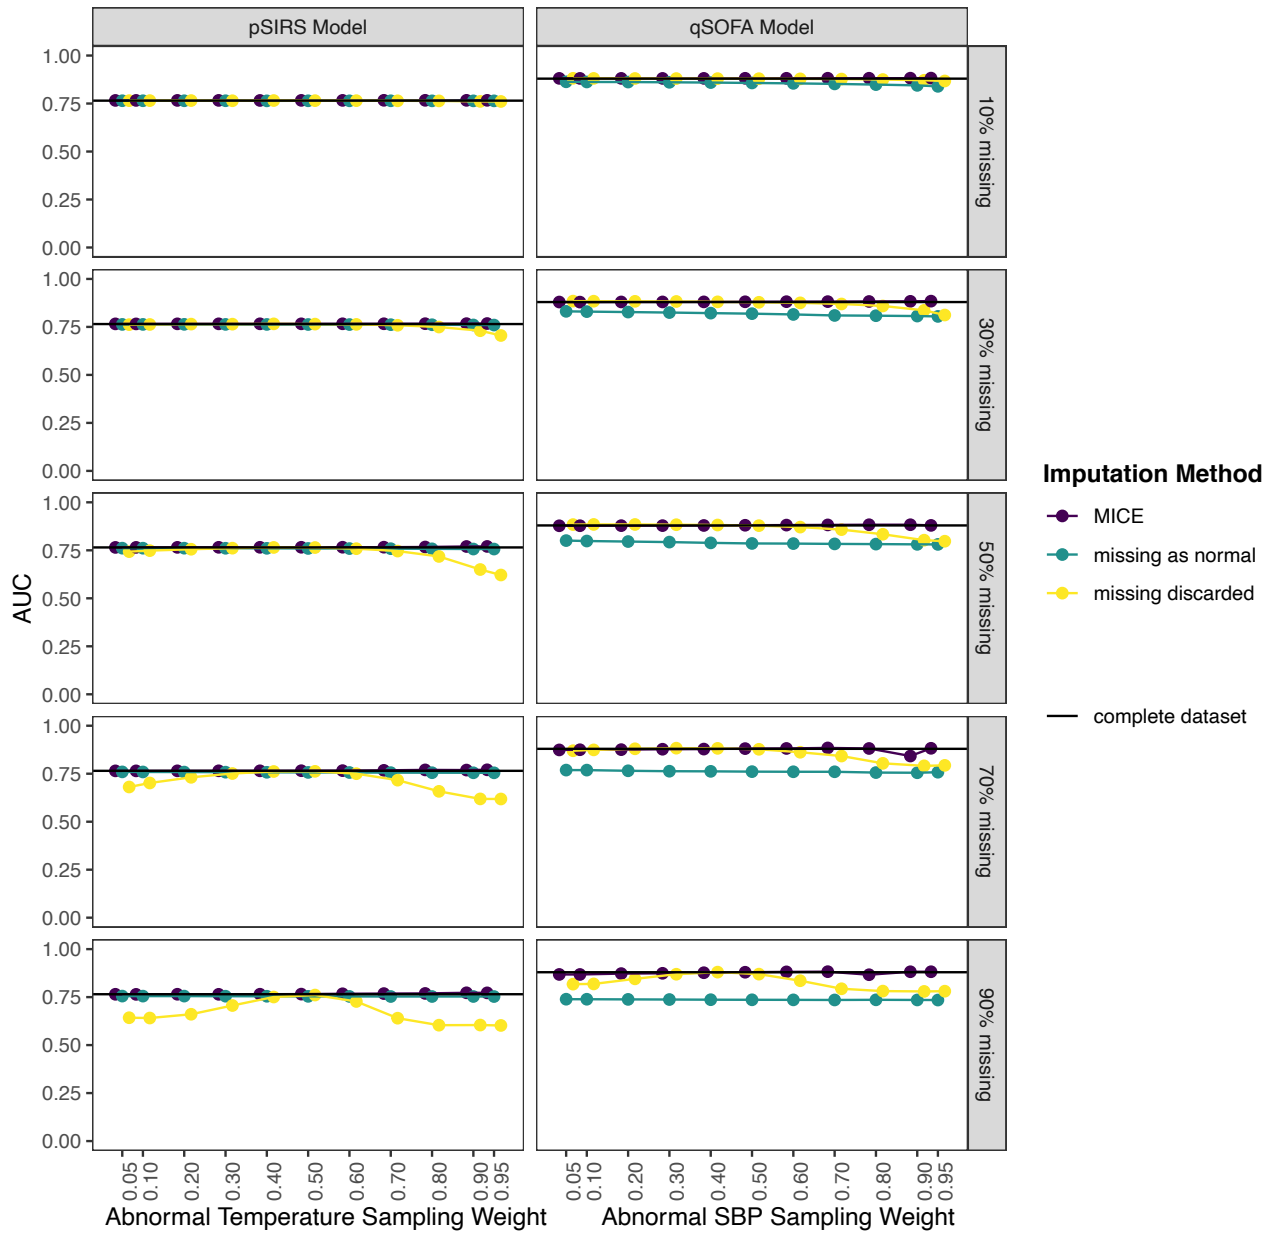

**Supplementary Figure F: Area under the receiver operating characteristic curve (AUC) for the pediatric systemic inflammatory response syndrome (pSIRS) model (left column of plots) and Sequential [Sepsis-Related] Organ Failure Assessment (qSOFA) model (right column of plots) when varying the amount of missingness from 10%, 30%, 50%, 70%, to 90% for the three imputation approaches: multivariate imputation by chained equations (MICE), complete case analysis (missing-discarded), and missing-as-normal. The reference line shows the AUC from the complete population datasets.**
